# Supplementary material for: Use of quantum chemical methods to study concomitant polymorphs of a new benzimidazole-1,2,3-triazole hybrid compound
Source: Royal Society of Chemistry journal article supplement (doi:10.1039/d3ce01152f), 2024-01-01
Supplement: d3ce01152f1.pdf [file d3ce01152f1.pdf]

## Electronic Supporting Information

### For paper

# Use of quantum chemical methods to study concomitant polymorphs of new benzimidazole-1,2,3-triazole hybrid compound

Svitlana V. Shishkina, Anna M. Shaposhnyk, Viktoriya V. Dyakonenko, Mariia O. Shyshkina,  
Sergiy M. Kovalenko

## Table of Contents

|                                                                                                                                                                                                                                                        |   |
|--------------------------------------------------------------------------------------------------------------------------------------------------------------------------------------------------------------------------------------------------------|---|
| <b>Figure S1.</b> $^{13}\text{C}$ NMR (100 MHz, DMSO- $d_6$ ) spectrum of the title compound                                                                                                                                                           | 3 |
| <b>Figure S2.</b> $^1\text{H}$ NMR (400 MHz, DMSO- $d_6$ ) spectrum of the title compound                                                                                                                                                              | 3 |
| <b>Figure S3.</b> LC/MS Data for Structural Determination of of the title compound                                                                                                                                                                     | 4 |
| <b>Figure S4</b> Hirshfeld surfaces mapped over $d_{\text{norm}}$ (at the top) and two-dimensional fingerprint plots (at the bottom) of the molecule in structures <b>1t</b> and <b>1m</b> .                                                           | 5 |
| <b>Figure S5</b> Molecules packing in structure <b>1t</b> .                                                                                                                                                                                            | 6 |
| <b>Figure S6</b> Packing of energy-vector diagrams in structure <b>1t</b> .                                                                                                                                                                            | 6 |
| <b>Figure S7</b> Packing of DBU in structure <b>1t</b> .                                                                                                                                                                                               | 6 |
| <b>Figure S8</b> Molecules packing in structure <b>1m</b> .                                                                                                                                                                                            | 7 |
| <b>Figure S9</b> Packing of energy-vector diagrams in structure <b>1m</b> .                                                                                                                                                                            | 7 |
| <b>Figure S10</b> Packing of DBU in structure <b>1m</b> .                                                                                                                                                                                              | 7 |
| <b>Table S1</b> Symmetry codes, interaction energy of the basic <b>molecule</b> with neighbouring ones ( $E_{\text{int}}$ , kcal/mol), the contribution of this energy to the total interaction energy (%) and bonding type in crystals of <b>1t</b> . | 8 |
| <b>Table S2</b> Symmetry codes, interaction energy of the basic <b>molecule</b> with neighbouring ones ( $E_{\text{int}}$ , kcal/mol), the contribution of this energy to the total interaction energy (%) and bonding type in crystals of <b>1m</b> . | 9 |
| <b>Table S3</b> Symmetry codes, interaction energy of the basic <b>dimer</b> with neighbouring ones                                                                                                                                                    |   |

( $E_{\text{int}}$ , kcal/mol), the contribution of this energy to the total interaction energy (%) and bonding type in crystals of **1t**.

10

**Table S4** Symmetry codes, interaction energy of the basic **dimer** with neighbouring ones ( $E_{\text{int}}$ , kcal/mol), the contribution of this energy to the total interaction energy (%) and bonding type in crystals of **1m**.

11

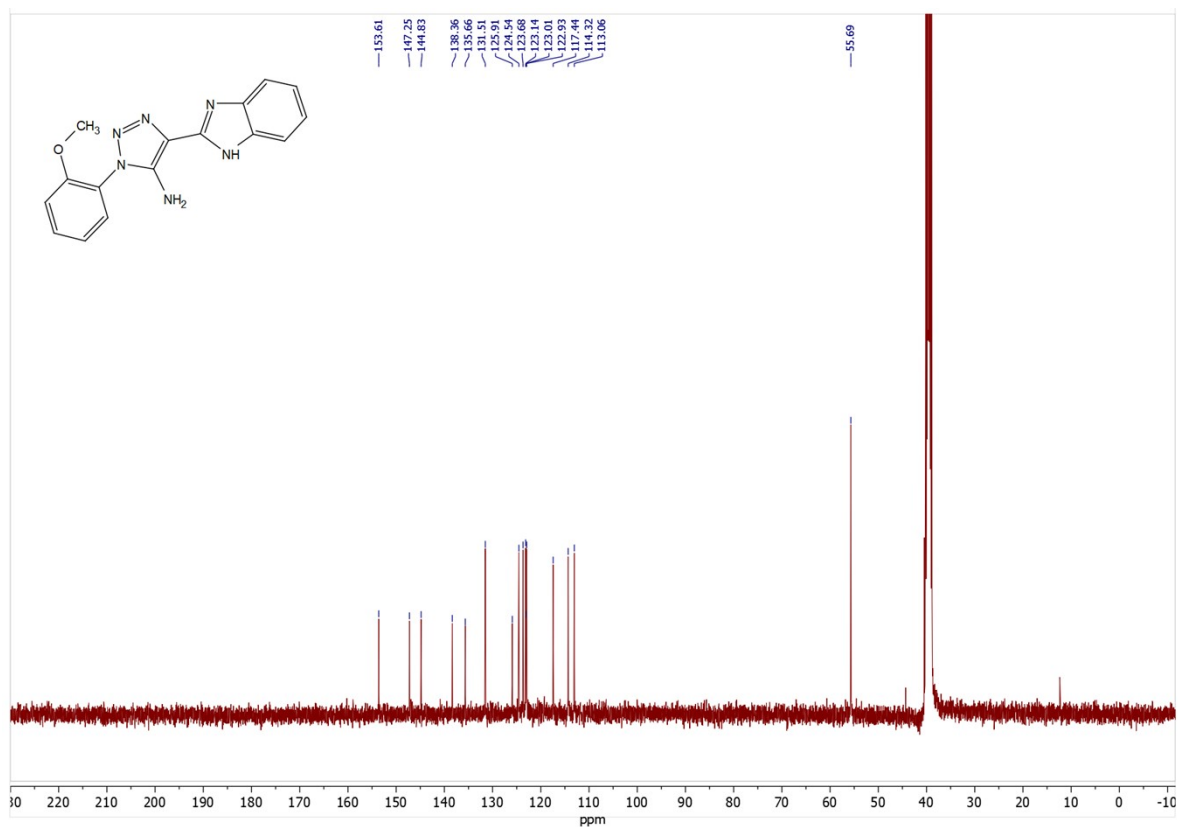

**Figure S1.**  $^{13}\text{C}$  NMR spectrum (100 MHz, DMSO- $d_6$ ) of the title compound.

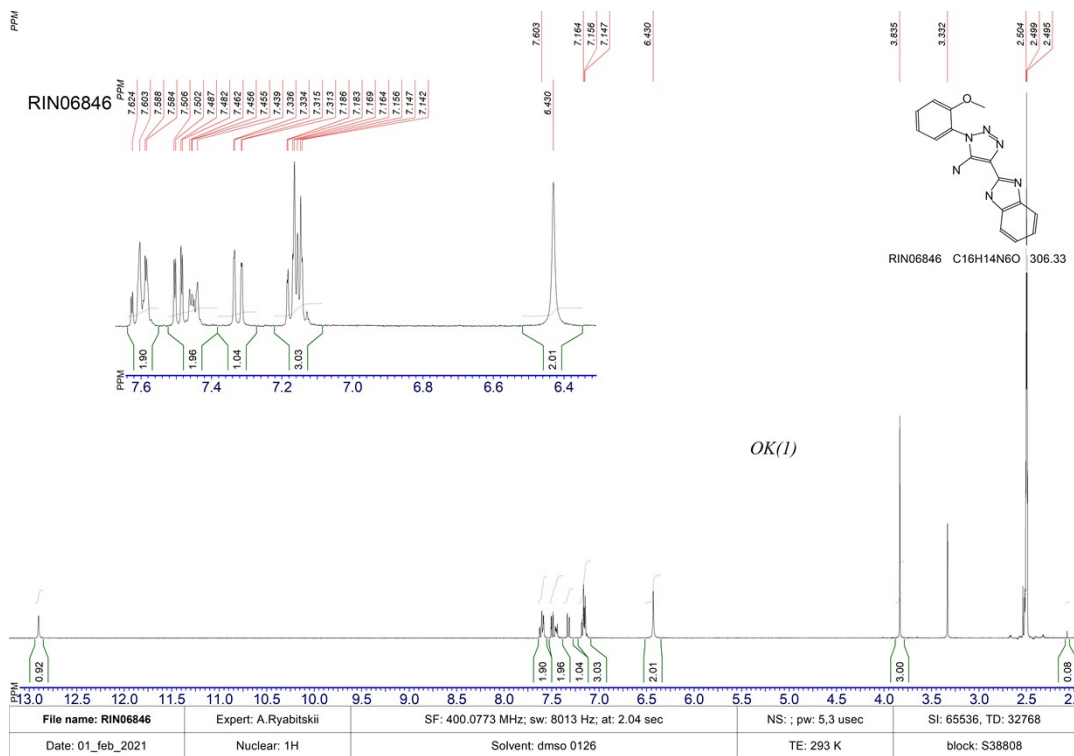

**Figure S2.**  $^1\text{H}$  NMR spectrum (400 MHz, DMSO- $d_6$ ) of the title compound.

Agilent 1260 LC/MSD SL  
 Diodearray G1315B (DAD1A-215nm; DAD1B-241nm)  
 Mass Quad G6140 (MSD1-Pos, MSD2-Neg)  
 ELSD Softa 1400 (ADC1 A, ELSD)

Mobile Phase:A-H<sub>2</sub>O+0.1%HCOOH;B-MeCN+0.1%HCOOH  
 Separation column: **98%**  
 Rapid Resolutionn HT Cartige 4.6x30mm,  
 1.8-Micron, Zorbx SB-C18

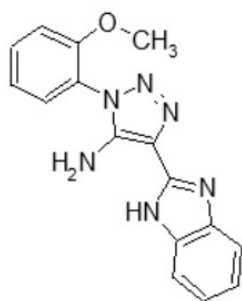

Mw 306,33

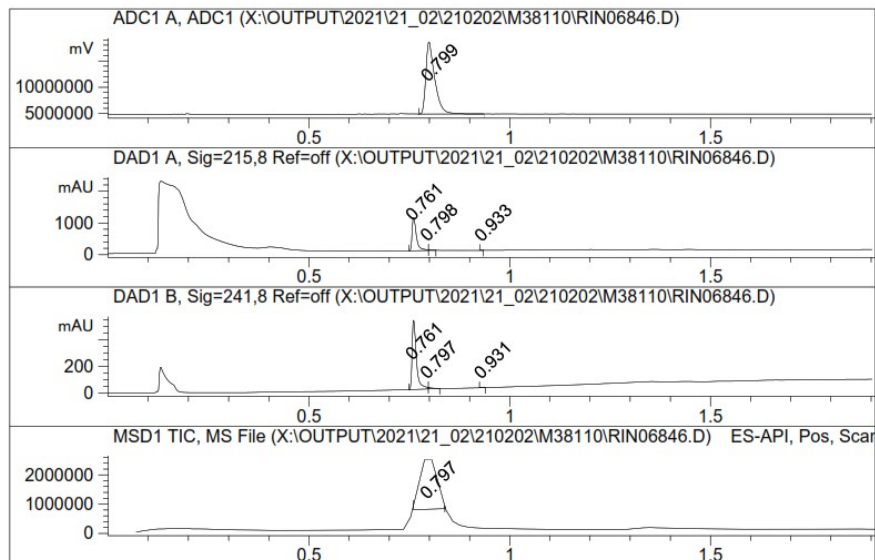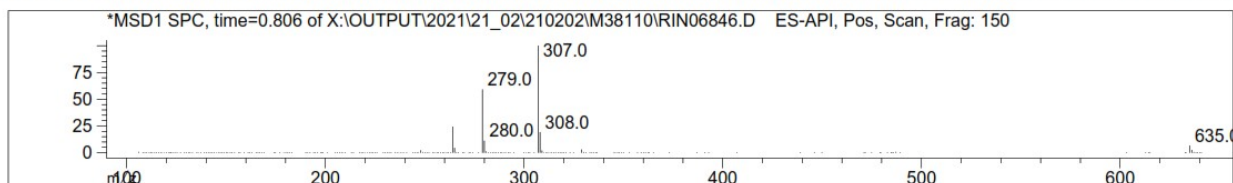

| # | Signal                    | R.Time | Area %  |
|---|---------------------------|--------|---------|
| 1 | ADC1 A, ADC1              | 0.799  | 100.000 |
| # | Signal                    | R.Time | Area %  |
| 1 | DAD1 A, Sig=215,8 Ref=off | 0.761  | 98.800  |
| 2 |                           | 0.798  | 1.093   |
| 3 |                           | 0.933  | 0.108   |
| # | Signal                    | R.Time | Area %  |
| 1 | DAD1 B, Sig=241,8 Ref=off | 0.761  | 98.036  |
| 2 |                           | 0.797  | 1.909   |
| 3 |                           | 0.931  | 0.055   |
| # | Signal                    | R.Time | Area %  |
| 1 | MSD1 TIC, MS File         | 0.797  | 100.000 |

**Figure S3.** LC/MS data for the title compound.

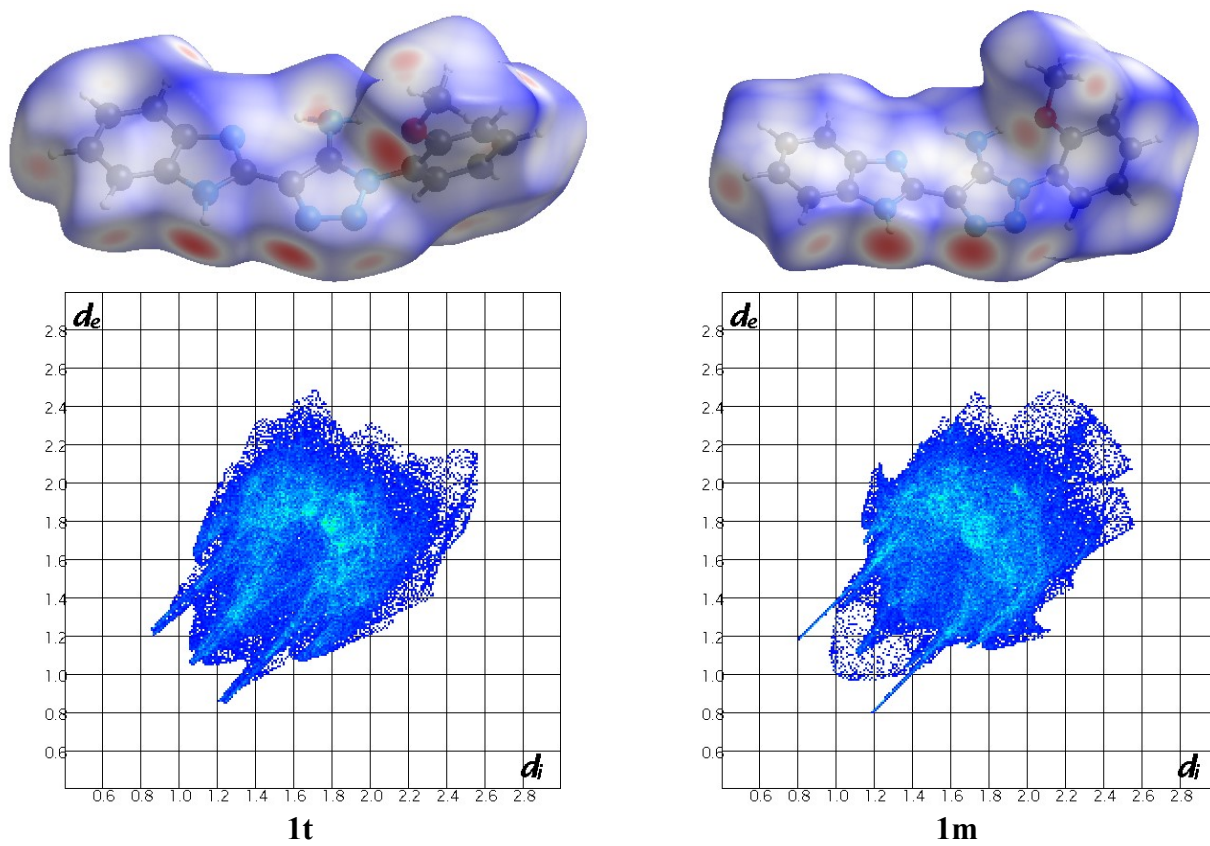

**Figure S4** Hirshfeld surfaces mapped over  $d_{norm}$  (at the top) and two-dimensional fingerprint plots (at the bottom) of the molecule in structures **1t** and **1m**.

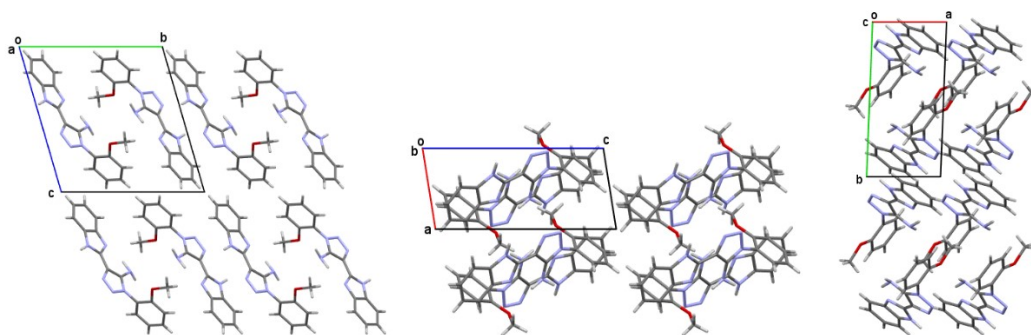

**Figure S5** Molecules packing in structure **1t**.

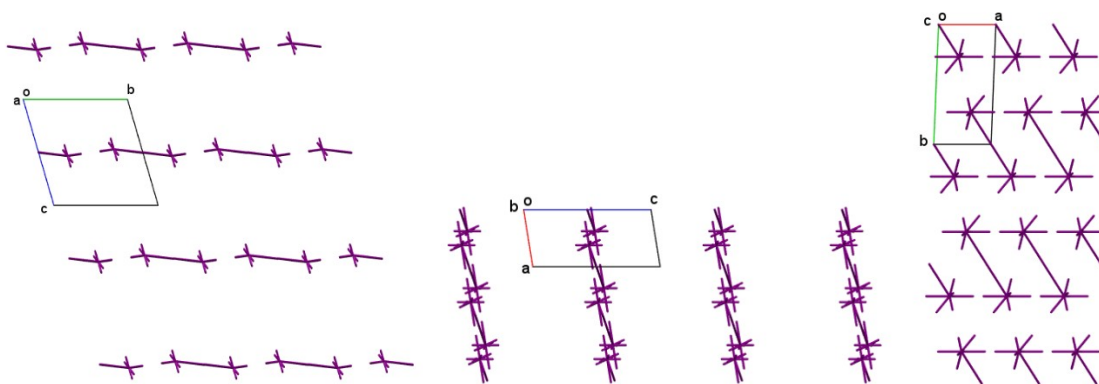

**Figure S6** Packing of energy-vector diagrams in structure **1t**.

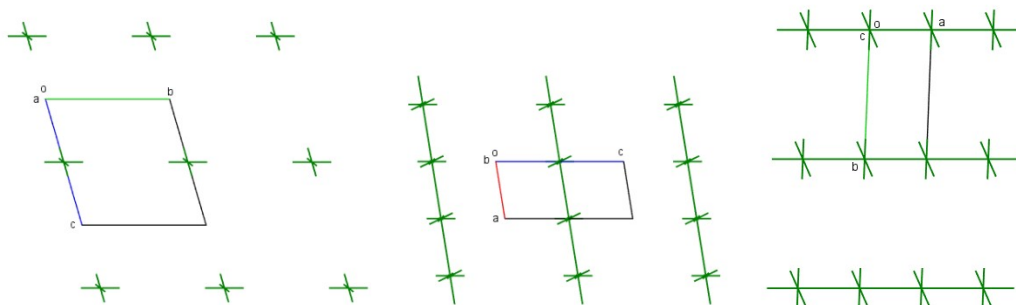

**Figure S7** Packing of DBU in structure **1t**.

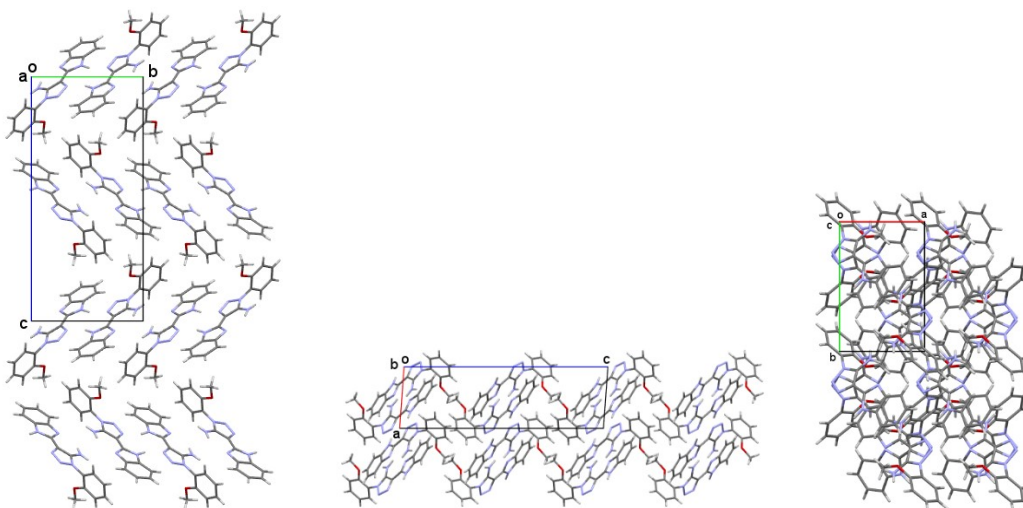

**Figure S8** Molecules packing in structure **1m**.

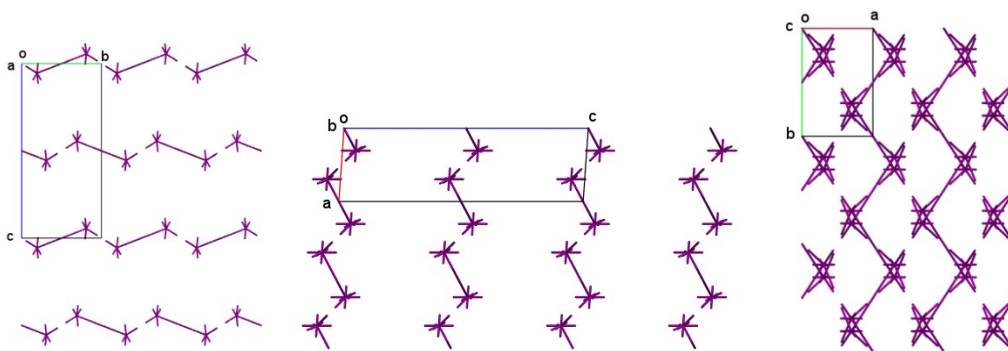

**Figure S9** Packing of energy-vector diagrams in structure **1m**.

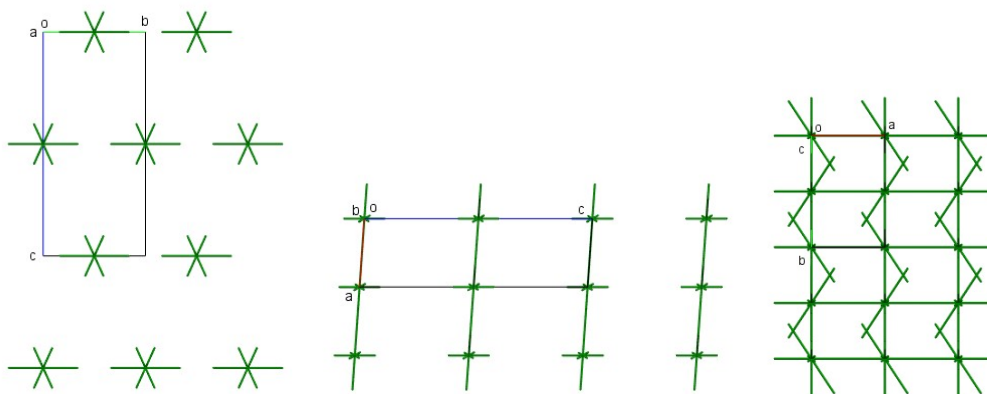

**Figure S10** Packing of DBU in structure **1m**.

**Table S1** Symmetry codes, interaction energy of the basic **molecule** with neighbouring ones ( $E_{\text{int}}$ , kcal/mol), the contribution of this energy to the total interaction energy (%) and bonding type in crystals of **1t**.

| Dimer       | Symmetry operation | $E_{\text{int}}$ , kcal/mol                    | Contribution to the total interaction energy, % | Interaction type    |
|-------------|--------------------|------------------------------------------------|-------------------------------------------------|---------------------|
| <b>t_1</b>  | -x,-y,1-z          | -17.39                                         | 18.7                                            | N2–H...N3           |
| <b>t_2</b>  | -1+x,y,z           | -14.23                                         | 15.3                                            | N6–H...O1           |
| <b>t_3</b>  | 1+x,y,z            | -14.23                                         | 15.3                                            | N6–H...O1           |
| <b>t_4</b>  | -x,1-y,1-z         | -10.07                                         | 10.8                                            | C16–H...C9( $\pi$ ) |
| <b>t_5</b>  | 1-x,-y,1-z         | -9.13                                          | 9.8                                             | stacking            |
| <b>t_6</b>  | 1-x,1-y,1-z        | -8.56                                          | 9.2                                             | non-specific        |
| <b>t_7</b>  | x,y,-1+z           | -3.50                                          | 3.8                                             | non-specific        |
| <b>t_8</b>  | x,y,1+z            | -3.50                                          | 3.8                                             | non-specific        |
| <b>t_9</b>  | 1+x,y,-1+z         | -3.17                                          | 3.4                                             | non-specific        |
| <b>t_10</b> | -1+x,y,1+z         | -3.17                                          | 3.4                                             | non-specific        |
| <b>t_11</b> | -x,1-y,2-z         | -2.18                                          | 2.3                                             | non-specific        |
| <b>t_12</b> | 2-x,-y,-z          | -1.74                                          | 1.9                                             | non-specific        |
| <b>t_13</b> | 1-x,1-y,2-z        | -1.17                                          | 1.3                                             | non-specific        |
| <b>t_14</b> | 1-x,-y,-z          | -1.16                                          | 1.2                                             | non-specific        |
|             |                    | $E_{\text{int}}(\text{total})$ -93.18 kcal/mol |                                                 |                     |



**Table S2** Symmetry codes, interaction energy of the basic **molecule** with neighbouring ones ( $E_{\text{int}}$ , kcal/mol), the contribution of this energy to the total interaction energy (%) and bonding type in crystals of **1m**.

| Dimer       | Symmetry operation | $E_{\text{int}}$ , kcal/mol                    | Contribution to the total interaction energy, % | Interaction type |
|-------------|--------------------|------------------------------------------------|-------------------------------------------------|------------------|
| <b>m_1</b>  | 2-x,2-y,1-z        | -18.77                                         | 20.7                                            | N2–H...N3        |
| <b>m_2</b>  | 2-x,1-y,1-z        | -13.25                                         | 14.6                                            | C–H... $\pi$     |
| <b>m_3</b>  | 1-x,2-y,1-z        | -13.16                                         | 14.5                                            | stacking         |
| <b>m_4</b>  | 1-x,1-y,1-z        | -12.84                                         | 14.2                                            | non-specific     |
| <b>m_5</b>  | 1+x,y,z            | -5.49                                          | 6.1                                             | non-specific     |
| <b>m_6</b>  | -1+x,y,z           | -5.49                                          | 6.1                                             | non-specific     |
| <b>m_7</b>  | x,3/2-y,-1/2+z     | -4.30                                          | 4.7                                             | non-specific     |
| <b>m_8</b>  | x,3/2-y,1/2+z      | -4.30                                          | 4.7                                             | non-specific     |
| <b>m_9</b>  | 2-x,1/2+y,1/2-z    | -3.53                                          | 3.9                                             | non-specific     |
| <b>m_10</b> | 2-x,-1/2+y,1/2-z   | -3.53                                          | 3.9                                             | non-specific     |
| <b>m_11</b> | 1+x,3/2-y,-1/2+z   | -1.66                                          | 1.8                                             | non-specific     |
| <b>m_12</b> | -1+x,3/2-y,1/2+z   | -1.66                                          | 1.8                                             | non-specific     |
| <b>m_13</b> | 1-x,1/2+y,1/2-z    | -1.40                                          | 1.5                                             | non-specific     |
| <b>m_14</b> | 1-x,-1/2+y,1/2-z   | -1.40                                          | 1.5                                             | non-specific     |
|             |                    | $E_{\text{int}}(\text{total})$ -90.77 kcal/mol |                                                 |                  |

**Table S3** Symmetry codes, interaction energy of the basic **dimer** with neighbouring ones ( $E_{\text{int}}$ , kcal/mol), the contribution of this energy to the total interaction energy (%) and bonding type in crystals of **1t**.

| Dimer        | Symmetry operation | $E_{\text{int}}$ , kcal/mol                     | Contribution to the total interaction energy, % | Interaction type    |
|--------------|--------------------|-------------------------------------------------|-------------------------------------------------|---------------------|
| <b>dt_1</b>  | -1+x,y,z           | -36.59                                          | 23.3                                            | Stacking/N-H...O    |
| <b>dt_2</b>  | 1+x,y,z            | -36.59                                          | 23.3                                            | Stacking/N-H...O    |
| <b>dt_3</b>  | x,-1+y,z           | -11.43                                          | 7.3                                             | C16-H...C9( $\pi$ ) |
| <b>dt_4</b>  | x,1+y,z            | -11.43                                          | 7.3                                             | C16-H...C9( $\pi$ ) |
| <b>dt_5</b>  | -1+x,-1+y,z        | -9.90                                           | 6.3                                             | non-specific        |
| <b>dt_6</b>  | 1+x,1+y,z          | -9.90                                           | 6.3                                             | non-specific        |
| <b>dt_7</b>  | x,y,1+z            | -8.25                                           | 5.2                                             | non-specific        |
| <b>dt_8</b>  | x,y,-1+z           | -8.25                                           | 5.2                                             | non-specific        |
| <b>dt_9</b>  | 1+x,y,-1+z         | -7.17                                           | 4.6                                             | non-specific        |
| <b>dt_10</b> | -1+x,y,1+z         | -7.17                                           | 4.6                                             | non-specific        |
| <b>dt_11</b> | x,-1+y,-1+z        | -2.23                                           | 1.4                                             | non-specific        |
| <b>dt_12</b> | x,1+y,1+z          | -2.23                                           | 1.4                                             | non-specific        |
| <b>dt_13</b> | -2+x,y,1+z         | -1.95                                           | 1.2                                             | non-specific        |
| <b>dt_14</b> | 2+x,y,-1+z         | -1.95                                           | 1.2                                             | non-specific        |
| <b>dt_15</b> | 1+x,1+y,1+z        | -1.15                                           | 0.7                                             | non-specific        |
| <b>dt_16</b> | -1+x,-1+y,-1+z     | -1.15                                           | 0.7                                             | non-specific        |
|              |                    | $E_{\text{int}}(\text{total})$ -157.34 kcal/mol |                                                 |                     |

**Table S4** Symmetry codes, interaction energy of the basic **dimer** with neighbouring ones ( $E_{\text{int}}$ , kcal/mol), the contribution of this energy to the total interaction energy (%) and bonding type in crystals of **1m**.

| Dimer        | Symmetry operation | $E_{\text{int}}$ , kcal/mol                     | Contribution to the total interaction energy, % | Interaction type |
|--------------|--------------------|-------------------------------------------------|-------------------------------------------------|------------------|
| <b>dm_1</b>  | 1+x,y,z            | -22.50                                          | 15.0                                            | stacking         |
| <b>dm_2</b>  | -1+x,y,z           | -22.50                                          | 15.0                                            | stacking         |
| <b>dm_3</b>  | x,-1+y,z           | -15.10                                          | 10.1                                            | C–H... $\pi$     |
| <b>dm_4</b>  | x,1+y,z            | -15.10                                          | 10.1                                            | C–H... $\pi$     |
| <b>dm_5</b>  | -1+x,-1+y,z        | -13.87                                          | 9.3                                             | non-specific     |
| <b>dm_6</b>  | 1+x,1+y,z          | -13.87                                          | 9.3                                             | non-specific     |
| <b>dm_7</b>  | 2-x,-1/2+y,3/2-z   | -7.94                                           | 5.3                                             | non-specific     |
| <b>dm_8</b>  | 2-x,-1/2+y,1/2-z   | -7.94                                           | 5.3                                             | non-specific     |
| <b>dm_9</b>  | 2-x,1/2+y,3/2-z    | -7.94                                           | 5.3                                             | non-specific     |
| <b>dm_10</b> | 2-x,1/2+y,1/2-z    | -7.94                                           | 5.3                                             | non-specific     |
| <b>dm_11</b> | 1-x,1/2+y,3/2-z    | -2.02                                           | 1.4                                             | non-specific     |
| <b>dm_12</b> | 1-x,-1/2+y,3/2-z   | -2.02                                           | 1.4                                             | non-specific     |
| <b>dm_13</b> | 3-x,1/2+y,1/2-z    | -2.02                                           | 1.4                                             | non-specific     |
| <b>dm_14</b> | 3-x,-1/2+y,1/2-z   | -2.02                                           | 1.4                                             | non-specific     |
| <b>dm_15</b> | 3-x,-1/2+y,3/2-z   | -1.69                                           | 1.1                                             | non-specific     |
| <b>dm_16</b> | 3-x,1/2+y,3/2-z    | -1.69                                           | 1.1                                             | non-specific     |
| <b>dm_17</b> | 1-x,-1/2+y,1/2-z   | 1.69                                            | 1.1                                             | non-specific     |
| <b>dm_18</b> | 1-x,1/2+y,1/2-z    | -1.69                                           | 1.1                                             | non-specific     |
|              |                    | $E_{\text{int}}(\text{total})$ -149.58 kcal/mol |                                                 |                  |
